# Supplementary material
Source: Springer Nature journal article supplement (https://www.springermedizin.de/resource/supplementary/12936_2007_524_MOESM5_ESM.pdf/9548188)

Chemical residue in % of baseline

Chemical residue in % of baseline

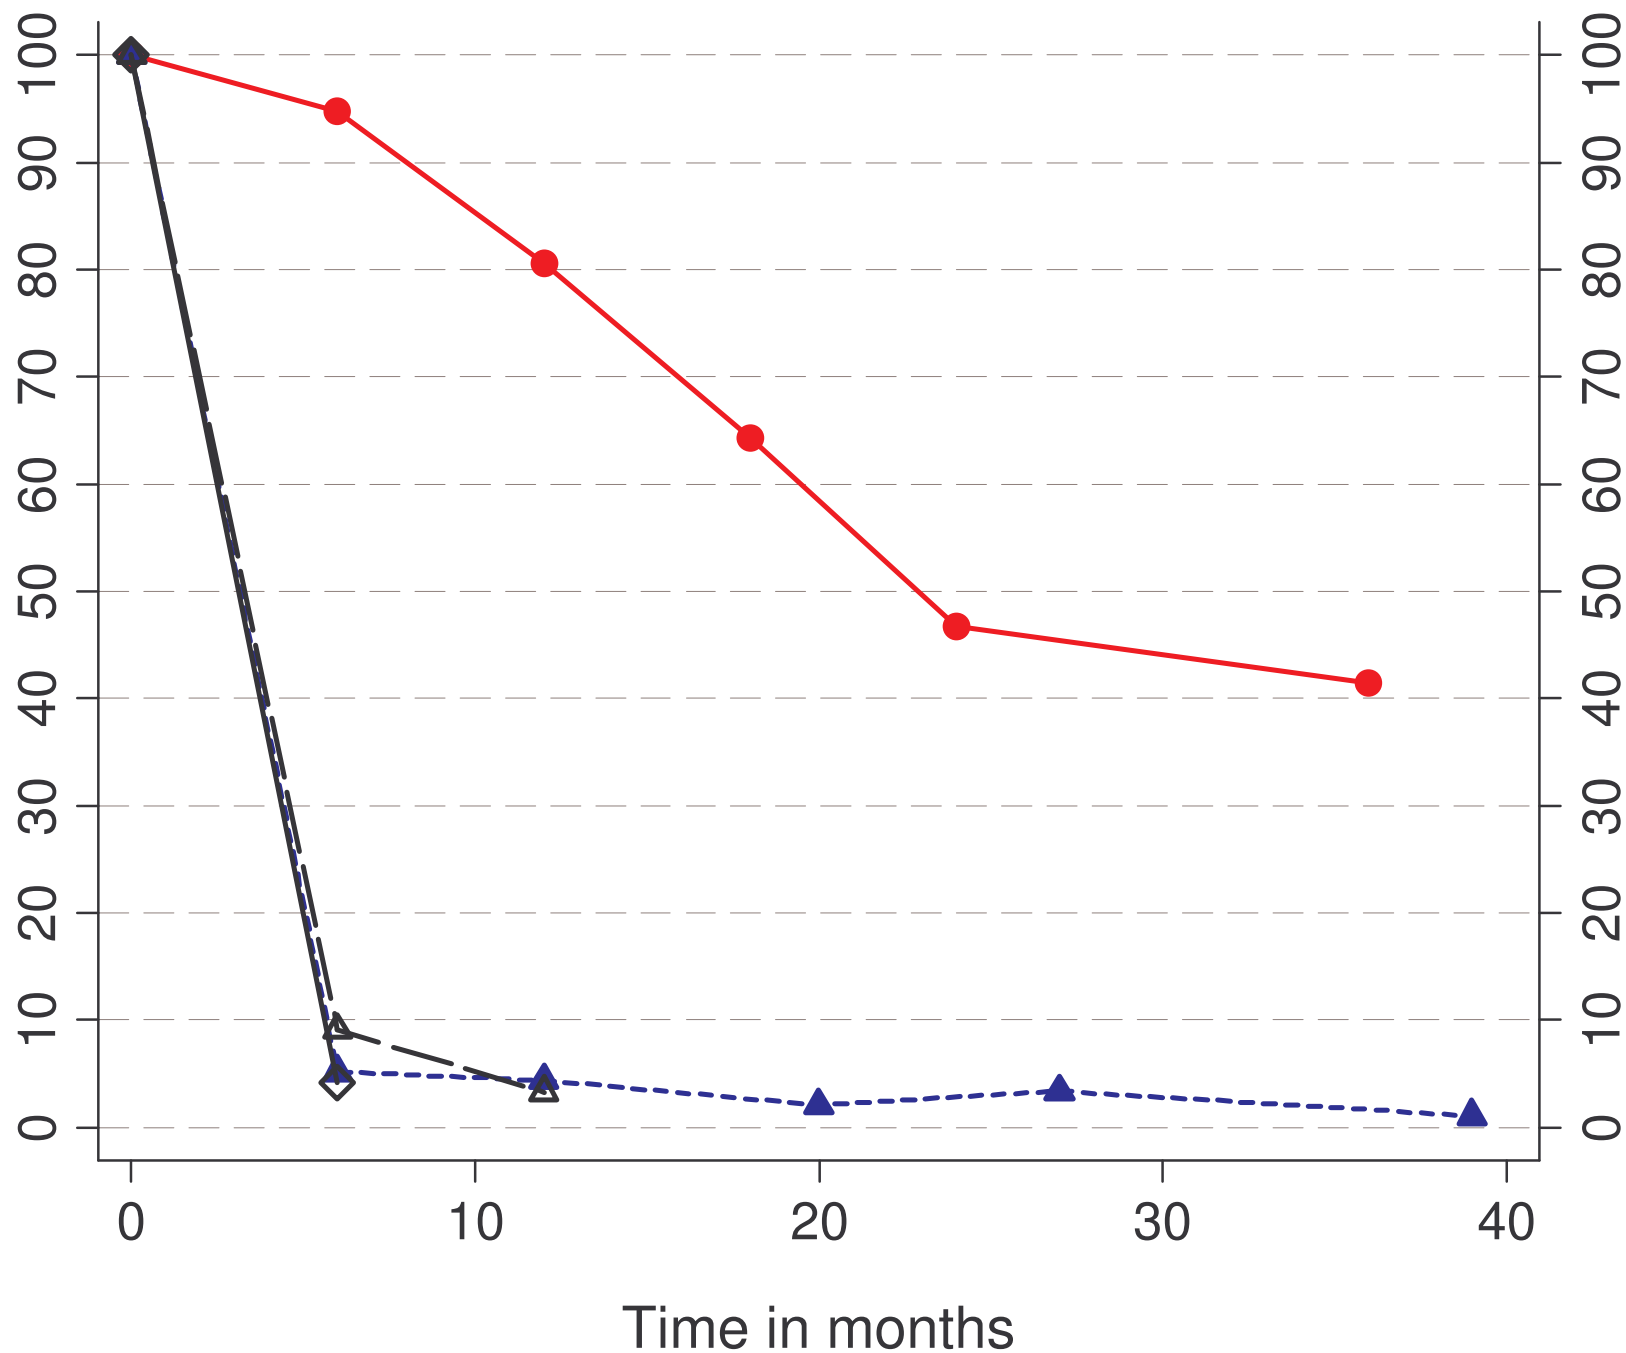

Supplement: MOESM5 [file 9548188]
